# 1 Improving the global dimensions of 2 intrinsically disordered proteins in 3 Martini 3

4 **F. Emil Thomassen<sup>1</sup>, Francesco Pesce<sup>1</sup>, Mette Ahrensback Roesgaard<sup>1</sup>, Giulio  
5 Tesei<sup>1</sup>, Kresten Lindorff-Larsen<sup>1\*</sup>**

\*For correspondence:  
[lindorff@bio.ku.dk](mailto:lindorff@bio.ku.dk) (KLL)

6 <sup>1</sup>Linderstrøm-Lang Centre for Protein Science, Department of Biology, University of  
7 Copenhagen, DK-2200 Copenhagen N, Denmark

---

## 9 Abstract

10 Coarse-grained molecular dynamics simulations are a useful tool to determine conformational  
11 ensembles of intrinsically disordered proteins (IDPs). Here, we show that the coarse-grained  
12 force field Martini 3 underestimates the global dimensions of IDPs when compared with small  
13 angle X-ray scattering (SAXS) data. Increasing the strength of protein-water interactions favors  
14 more expanded conformations, improving agreement with SAXS data and alleviating problems  
15 with overestimated IDP-IDP interactions.

---

## 17 Introduction

18 Intrinsically disordered proteins (IDPs) are proteins that do not fold into a single well-defined struc-  
19 ture, but rather sample a range of conformations (*Wright and Dyson, 1999*). Molecular dynamics  
20 (MD) simulations are a useful tool for structural characterization of IDPs. Using integrative meth-  
21 ods, MD simulations can be used to determine conformational ensembles of IDPs in accordance  
22 with experimental data. Successful application of MD simulations relies on accurate force fields  
23 and adequate sampling of protein conformations (*Bottaro and Lindorff-Larsen, 2018*).

24 Coarse-grained MD simulations, where groups of atoms are represented by single beads, allow  
25 for efficient sampling of IDP conformations (*Ingólfsson et al., 2014*). One of the most widely used  
26 coarse-grained force fields for biomolecular systems is Martini (*Marrink et al., 2007; Monticelli  
27 et al., 2008*). Martini maps two to four non-hydrogen atoms to one bead and is mainly param-  
28 eterized against thermodynamic partitioning data. While Martini has been used successfully to  
29 study a wide range of biomolecular systems, earlier versions of the force field have been found to  
30 underestimate the global dimensions of flexible multidomain proteins (*Larsen et al., 2020; Martin  
31 et al., 2021*) and overestimate protein-protein interactions (*Stark et al., 2013; Berg and Peter, 2019;  
32 Alessandri et al., 2019; Benayad et al., 2021; Majumder and Straub, 2021; Lamprakis et al., 2021*).  
33 In order to favor more expanded conformations of multidomain proteins, we have previously used  
34 an approach based on increasing the strength of non-bonded interactions between protein and  
35 water beads (*Larsen et al., 2020; Martin et al., 2021*), improving the agreement with SAXS experi-  
36 ments. Similarly, others have decreased the strength of non-bonded interactions between protein  
37 beads to improve the accuracy of IDP phase partitioning (*Benayad et al., 2021*) and protein-protein  
38 interactions (*Stark et al., 2013*).

39 A new version of the Martini force field, Martini 3, was recently released, featuring a rebalanc-  
40 ing of non-bonded interaction terms and addition of new bead-types (*Souza et al., 2021*). Martini 3

41 shows improved accuracy for a wide range of systems in biology and materials science and a high  
42 level of transferability. Improved areas include molecular packing, transmembrane helix interac-  
43 tions, protein aggregation, and DNA base-pairing (*Souza et al., 2021; Lamprakis et al., 2021*). Here,  
44 we have tested the ability of Martini 3 to reproduce the global dimensions of IDPs. We find that  
45 simulations with Martini 3 on average underestimate the radius of gyration ( $R_g$ ) by  $\approx 30\%$ , and  
46 suggest a rescaling factor for increased protein-water interactions that improves agreement with  
47 small angle X-ray scattering (SAXS) data.

## 48 Results and Discussion

49 We chose a set of twelve IDPs and three multidomain proteins to cover a range of different systems  
50 with available SAXS data (*Riback et al., 2017; Cordeiro et al., 2019; Mylonas et al., 2008; Riback et al.,*  
51 *2017; Ahmed et al., 2021; Martin et al., 2020; Johnson et al., 2017; Gomes et al., 2020; Kjaergaard*  
52 *et al., 2010; Jephthah et al., 2019; Fagerberg et al., 2020; Sonntag et al., 2017; Martin et al., 2021*)  
53 and ran MD simulations of each protein using the Martini 3 force field. For all proteins, we found  
54 that the ensembles generated with Martini 3 were too compact when comparing the average  $R_g$   
55 from the simulations with values calculated from SAXS profiles using Guinier analyses. A direct  
56 comparison with the experimental SAXS data also revealed deviations beyond the level expected  
57 by experimental errors (figure 1).

58 For atomistic force-fields, it has previously been shown that increasing the protein-water inter-  
59 actions will favour expanded conformations of IDPs, resulting in more accurate global dimensions  
60 (*Best et al., 2014*). Inspired by this approach, we increased the strength of protein-water interac-  
61 tions by rescaling the non-bonded Lennard-Jones potentials between all protein and water beads  
62 by a rescaling factor,  $\lambda$ . For all proteins, increased protein-water interactions ( $\lambda > 1$ ) resulted in an  
63 increased  $R_g$  and improved agreement with SAXS data as measured by the reduced  $\chi^2$  ( $\chi_r^2$ ). To  
64 determine an optimal value of  $\lambda$ , we scanned six  $\lambda$ -values from 1.04 to 1.14 for each protein. Based  
65 on the  $\chi_r^2$  to SAXS data and agreement between  $R_g$  calculated from ensemble coordinates and  $R_g$   
66 calculated from experimental SAXS profiles we chose  $\lambda = 1.08$  as the optimal value (figure 1a-c). We  
67 performed the same analysis for three multidomain proteins with flexible linkers, which all had  
68 an optimal  $\lambda$  around 1.04 (figure 1d-e), suggesting that the optimal value is different for folded  
69 domains and IDPs.

70 To further investigate the effect of rescaling protein-water interactions, we performed a num-  
71 ber of tests comparing the original force field ( $\lambda = 1$ ) to the force field with increased protein-water  
72 interactions ( $\lambda = 1.06$  and  $1.08$ ). First, we tested the effect on the intrachain interactions in IDPs  
73 by comparing paramagnetic relaxation enhancement (PRE) data calculated from simulations of  $\alpha$ -  
74 Synuclein, the FUS low-complexity domain (LCD) and the hnRNPA2 (A2) LCD to PRE experiments  
75 (*Dedmon et al., 2005; Monahan et al., 2017; Ryan et al., 2018*). We found that, for  $\alpha$ -Synuclein,  
76  $\lambda = 1.06$  and  $1.08$  improved the agreement with experimental PREs, while the agreement worsened  
77 for the two other proteins (figure 2a).

78 Next, we tested the effect of rescaling protein-water interactions on interchain IDP-IDP interac-  
79 tions. We simulated two copies of the FUS LCD at conditions matching interchain PRE experiments  
80 (*Monahan et al., 2017*) and calculated interchain PREs from the simulations for comparison. The  
81 original force-field did not show good agreement with experimental PREs, especially for the N-  
82 terminal spin-label at residue 16. However, the agreement worsened with  $\lambda = 1.06$  and  $1.08$  (figure  
83 2b).

84 As a negative test of IDP-IDP interactions, we simulated two copies of  $\alpha$ -Synuclein, which should  
85 not interact under the given conditions based on PRE experiments (*Dedmon et al., 2005*). The  
86 original force field greatly overestimated the interaction of the two  $\alpha$ -Synuclein chains, predicting a  
87  $75 \pm 6\%$  population of the bound state. Increasing protein-water interactions by  $\lambda = 1.06$  and  $1.08$   
88 reduced the population of the bound state to  $12 \pm 1.3\%$  and  $8 \pm 0.5\%$  respectively, thus improving  
89 the agreement with experiment (figure 2c). For comparison, we also calculated the population of  
90 the bound state in our simulations of the FUS LCD dimer, which should associate to a measurable

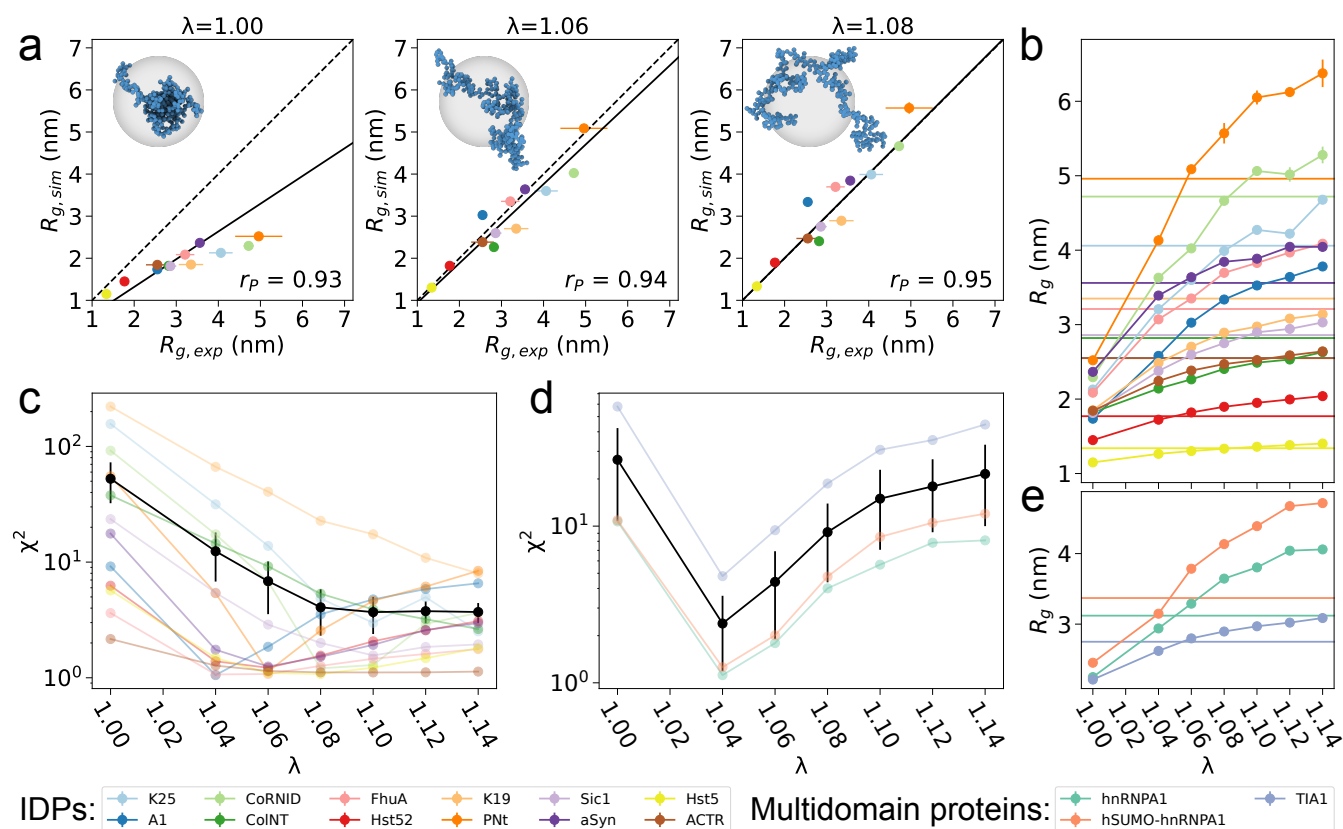

**Figure 1. Increased protein-water interactions improve the agreement with SAXS data for IDPs and multidomain proteins**

**a.** Average  $R_g$  from MD simulations with three different rescaling factors for the protein-water interactions ( $\lambda$ ) plotted against experimental  $R_g$  from Guinier analysis of SAXS data for a set of twelve IDPs. Error bars for the experimental values were determined in the Guinier fit, and those for the simulations (here and elsewhere) were determined by block error analysis (Flyvbjerg and Petersen, 1989). Linear fit with intercept 0 weighted by experimental errors is shown as a solid line. Pearson correlation coefficient ( $r_P$ ) is shown. The insert shows structures of Tau K25 (Mylonas et al., 2008) with the average  $R_g$  found for each  $\lambda$ . **b.** Average  $R_g$  from MD simulations over a range of  $\lambda$ -values for a set of twelve IDPs. Experimental values from Guinier analysis of SAXS data are shown as horizontal lines. **c-d.** Reduced  $\chi_r^2$  between SAXS profiles calculated from MD simulations and experimental SAXS profiles for a range of  $\lambda$ -values for a set of twelve IDPs (c) and three multidomain proteins (d). Average  $\chi_r^2$  is shown in black with standard error of the mean as error bars (note the log scale). **e.** Average  $R_g$  from MD simulations over a range of  $\lambda$ -values for three multidomain proteins. Experimental values from Guinier analysis of SAXS data are shown as horizontal lines. Data and scripts are available via [github.com/KULL-Centre/papers/tree/main/2021/Martini-Thomasen-et-al](https://github.com/KULL-Centre/papers/tree/main/2021/Martini-Thomasen-et-al)

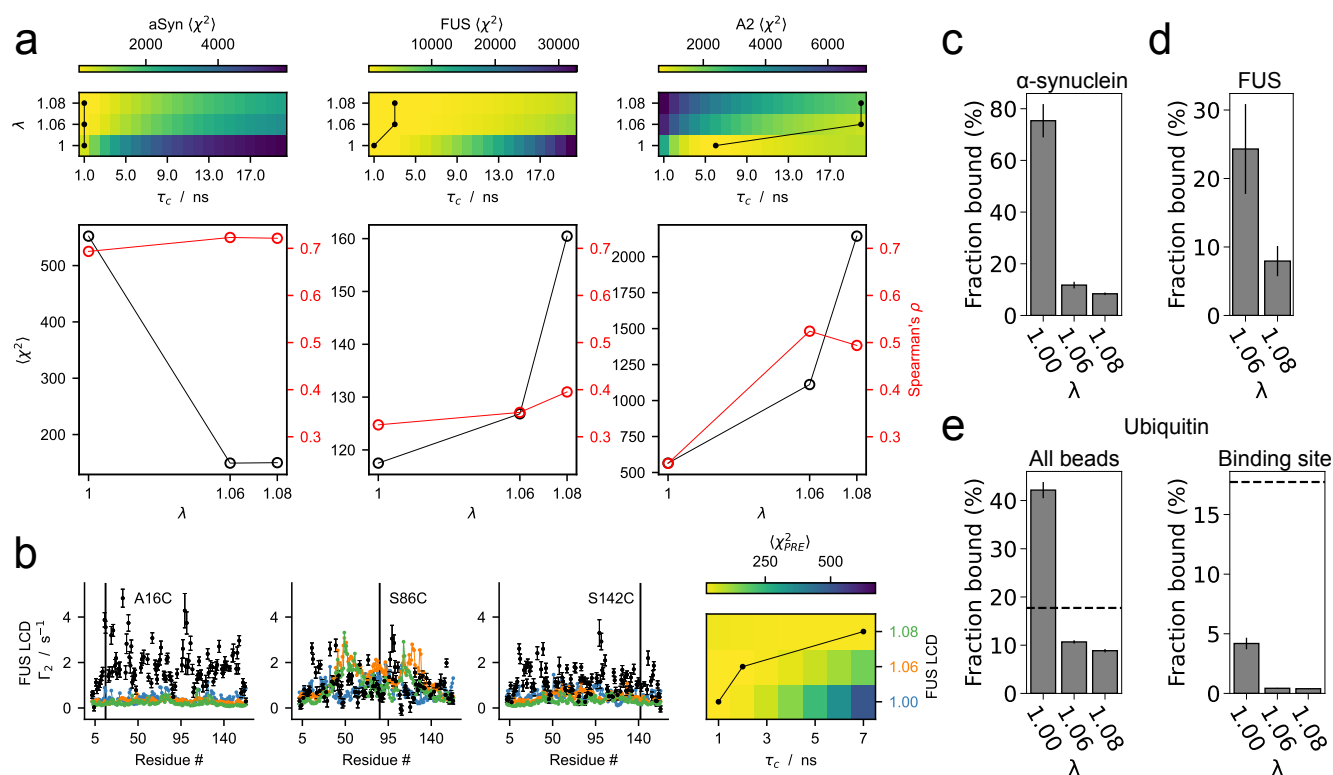

**Figure 2. Effect of increased protein-water interactions on intrachain contacts and protein-protein interactions**

**a.** Agreement between intrachain PREs calculated from MD simulations with different protein-water interaction rescaling factors  $\lambda$  and experimental PREs for the three IDPs  $\alpha$ -synuclein, FUS LCD and hnRNPA2 LCD. Agreement is measured by  $\chi_r^2$  and Spearman correlation coefficient for PREs over all spin-label sites. Rotational correlation time  $\tau_c$  was selected individually for each  $\lambda$  to minimize  $\chi_r^2$ . **b.** Interchain PREs calculated from MD simulations with different  $\lambda$ -values of two copies of FUS LCD and comparison with experimental PREs (black). PREs are shown for three spin-label sites. Rotational correlation time  $\tau_c$  was selected individually for each  $\lambda$  to minimize  $\chi_r^2$ . **c-d.** Fraction bound calculated from MD simulations with different  $\lambda$ -values of two copies of  $\alpha$ -synuclein (c) and FUS LCD (d). Error bars are standard error of the mean over ten replicas. **e.** Fraction bound calculated from MD simulations with different  $\lambda$ -values of two copies of ubiquitin. Definition of the bound state was based on the minimum distance between all beads (left) or the known binding site only (right) (Liu et al., 2012). Fraction bound based on experimentally determined  $K_d$  is shown as a dashed line (Liu et al., 2012). Error bars are standard error of the mean over ten replicas.

91 extent based on PRE experiments (*Monahan et al., 2017*). This analysis was only performed for  
92 simulations with  $\lambda=1.06$  and 1.08, as we did not observe unbinding of the dimer after dimeriza-  
93 tion with the original force field (figure S3). In qualitative agreement with experiment, FUS had a  
94 higher population of the bound state than  $\alpha$ -Synuclein at  $\lambda=1.06$ , despite being at a four times lower  
95 concentration (figure 2c-d). The two proteins had similar population of the bound state at  $\lambda=1.08$ ,  
96 indicating that a  $\lambda$  of 1.06 may be the optimal value for simulating IDP-IDP interactions.

97 Finally, we investigated the effect of rescaling protein-water interactions on interactions be-  
98 tween folded proteins. Inspired by previous simulations (*Berg and Peter, 2019*) and NMR exper-  
99 iments (*Liu et al., 2012*), we simulated two copies of ubiquitin and calculated the population of  
100 the bound state. Simulations with Martini 3 appear to overestimate ubiquitin homodimerization  
101 when comparing the population of the bound state in the simulations with the value estimated by  
102 NMR chemical shift perturbations ( $K_d = 4.9 \pm 0.3$  mM; *Liu et al. (2012)*). Because the interactions  
103 we observe in the simulations were not specific to the homodimerization site determined by NMR  
104 (*Liu et al., 2012*), this result was, however, dependent on whether the definition of the bound state  
105 was restricted to the known ubiquitin homodimerization site or not, illustrating that Martini 3 was  
106 not capturing the specificity of the interaction. However,  $\lambda=1.06$  and 1.08 overly weakened the in-  
107 teraction, even when interactions outside the homodimerization site were considered part of the  
108 bound state (figure 2e).

109 Our results show that simulations with the Martini 3 force field result in too small global di-  
110 mensions of IDPs and multidomain proteins, and that rescaling the Lennard-Jones potentials for  
111 protein-water interactions by a factor  $\lambda=1.08$  improves agreement with experiments. For multidom-  
112 main proteins containing flexible linkers or IDRs, a rescaling factor of  $\lambda=1.04$  seems to be sufficient.  
113 Our results also show that Martini 3 greatly overestimates  $\alpha$ -synuclein homodimerization, indicat-  
114 ing that IDP-IDP interactions are too strong, but increasing protein-water interactions lead to a  
115 more accurate balance.

116 While increasing the strength of protein-water interactions improves the accuracy of the global  
117 dimensions of IDPs and the strength of IDP-IDP interactions, our results indicate that this is not the  
118 case for the interactions of folded proteins. First, increased protein-water interactions result in an  
119 underestimation of ubiquitin homodimerization. Second, multidomain proteins consisting of both  
120 folded domains and IDRs require a lower  $\lambda$  to reach agreement with SAXS data.

121 For the FUS LCD and the A2 LCD, the agreement with intrachain PREs are worsened by in-  
122 creasing  $\lambda$  to 1.06 and further worsened by going to 1.08. This indicates that, while the global  
123 dimensions of IDPs become more accurate with increased protein-water interactions, it potentially  
124 comes at the cost of specificity in intrachain interactions. In support of this, there is less sequence-  
125 dependent separation of  $R_g$  between different proteins with  $\lambda=1.08$  than with the original force  
126 field (figure S2c). Additionally, the optimal value of  $\lambda$  correlates with the relative expansion of the  
127 IDP, showing that the optimal value of  $\lambda$  is partly sequence-dependent (figure 2Sb). Thus, a possi-  
128 ble explanation for the worsened agreement with intrachain PREs for FUS LCD and A2 LCD is that  
129 they are relatively compact IDPs (*Ryan et al., 2018*), and  $\lambda$  values of 1.06 and 1.08 may be too high  
130 for these proteins. However, we also show evidence that the force-field is able to capture some  
131 sequence-specificity with  $\lambda=1.06$ : the FUS LCD self-associates more strongly than  $\alpha$ -synuclein de-  
132 spite being at a four times lower concentration, in line with experimental observations (*Dedmon*  
133 *et al., 2005; Monahan et al., 2017*). Taken together, these results suggest that a  $\lambda$ -value of 1.06  
134 yields a good compromise between improving global dimensions and retaining specificity in inter-  
135 actions.

136 Alternatively, a  $\lambda$ -value can be chosen specifically for the system of interest if the level of com-  
137 paction has been probed experimentally. This does, however, not necessarily entail optimizing  
138  $\lambda$ -values for every condition of interest. For example, we have previously selected a single  $\lambda$ -value  
139 for simulations of hnRNPA1 (with a beta version of Martini 3) based on SAXS data at one salt con-  
140 centration, and studied the effect of salt on the level of compaction by keeping the  $\lambda$ -value fixed but  
141 varying the salt concentration (*Martin et al., 2021*). A similar approach may be useful to transfer

142  $\lambda$ -values between proteins with related sequence properties, for example in mutagenesis studies.

## 143 Conclusions

144 The functions of some IDPs and multidomain proteins depend on their ability to form biomolecular  
145 condensates (*Boeynaems et al., 2018*), often involving the formation of transient and multivalent  
146 protein-protein interactions and liquid-liquid phase separation (LLPS). Generally, the propensity of  
147 an IDP to undergo LLPS is correlated with its single-chain compactness (*Choi et al., 2020*). A mod-  
148 ified version of Martini2.2 with decreased protein-protein interactions has already been shown  
149 to improve the description of LLPS of an IDP (*Benayad et al., 2021*), and Martini 3 has also been  
150 used to study salt-dependent condensate formation (*Tsanai et al., 2021*). We expect that increased  
151 protein-water interactions, yielding improved accuracy of the global dimensions of IDPs and weak-  
152 ened IDP-IDP interactions, will be useful in future applications of Martini 3 to study the role of IDPs  
153 in biomolecular condensates as well as their single-chain conformations and dynamics.

## 154 Acknowledgments

155 We thank Simone Orioli, Thea K. Schulze and Yong Wang for useful discussions and suggestions.  
156 We acknowledge the use of computational resources from Computerome 2.0. This research was  
157 supported by the Lundbeck Foundation BRAINSTRUC initiative (R155-2015-2666 to KLL) and the EU  
158 Horizon 2020 Marie Skłodowska-Curie grant agreement (101025063 to GT)

## 159 Methods

### 160 IDP simulations

161 We selected a set of twelve IDPs of varied sequence, with lengths between 24 and 334 amino acid  
162 residues and with SAXS data available: the N-terminal region of pertactin (Pnt) (*Riback et al., 2017*),  
163 the NR interaction domain of N-CoR (CoRNID) (*Cordeiro et al., 2019*), two deletion mutants of Tau  
164 (K19 and K25) (*Mylonas et al., 2008*), the  $\alpha$ -plug domain from a TonB-dependent receptor  
165 (FhuA) (*Riback et al., 2017*),  $\alpha$ -synuclein (aSyn) (*Ahmed et al., 2021*), the low-complexity domain of  
166 hnRNPA1 (A1) (*Martin et al., 2020*), the T-domain of colicin N (CoINT) (*Johnson et al., 2017*), Sic1  
167 (*Gomes et al., 2020*), the activation domain of ACTR (ACTR) (*Kjaergaard et al., 2010*), Histatin-5  
168 (Hst5) (*Jepthah et al., 2019*) and a tandem repeat of Histatin-5 (Hst52) (*Fagerberg et al., 2020*).

169 We performed all MD simulations using Gromacs 2020.3 (*Abraham et al., 2015*) and the Mar-  
170 tini3.0 force field (or adapted force fields with rescaled protein-water interactions) (*Souza et al.,*  
171 *2021*). Proteins were coarse-grained using the Martinize2 python script, placed in a dodecahedral  
172 box using Gromacs and solvated using the Insane python script (*Wassenaar et al., 2015*). Initial box  
173 size was chosen by using starting structures from simulations in *Tesei et al. (2021b)* correspond-  
174 ing to the 95th percentile of  $R_g$ -distributions and using Gromacs *editconf* with the flag *-d 4.0*. Box  
175 size was later increased if necessary. NaCl concentration was set to match the conditions in SAXS  
176 experiments and to neutralize the system. No secondary structure or elastic network model was  
177 assigned with Martinize2 for IDPs and IDRs. Energy minimization was performed using steepest  
178 descent for 10,000 steps with a 30 fs timestep. The Lennard-Jones potentials between all protein  
179 and water beads were rescaled by a factor  $\lambda$ . Seven values of  $\lambda$  were tested for each system: 1.00  
180 (original force-field), 1.04, 1.06, 1.08, 1.10, 1.12 and 1.14. The systems were equilibrated for 10  
181 ns with a 2 fs timestep using the Velocity-Rescaling thermostat (*Bussi et al., 2007*) and Parinello-  
182 Rahman barostat (*Parrinello and Rahman, 1981*). Production simulations were run for between 16  
183  $\mu$ s and 100  $\mu$ s with a 20 fs timestep using the Velocity-Rescaling thermostat and Parinello-Rahman  
184 barostat. The temperature was set to match conditions in SAXS experiments and the pressure was  
185 set to 1 bar. Non-bonded interactions were treated with the Verlet cut-off scheme. The cut-off  
186 for Van der Waals interactions was set to 1.1 nm. Coulomb interactions were treated using the  
187 reaction-field method with a 1.1 nm cut-off and dielectric constant of 15. Frames were saved every  
188 1 ns. Periodic boundary conditions were treated with Gromacs *trjconv* with the flags *-pbc whole*

189 -center. Simulation convergence was assessed using block-error analysis (*Flyvbjerg and Petersen,*  
190 *1989*) of the  $R_g$  using the BLOCKING code (<https://github.com/fpesceKU/BLOCKING>). Simulations  
191 were backmapped to all-atom using a modified (*Larsen et al., 2020*) version of the Backward algo-  
192 rithm (*Wassenaar et al., 2014*), in which simulation runs are excluded and energy minimization is  
193 shortened to 200 steps.

194 We also ran MD simulations of two IDPs with paramagnetic relaxation enhancement (PRE) data  
195 available: the low-complexity domain of FUS (FUS) (*Monahan et al., 2017*) and low-complexity do-  
196 main of hnRNPA2 (A2) (*Ryan et al., 2018*). For these proteins we set the NaCl concentration and  
197 temperature to match the conditions in PRE experiments. Additionally, we reran simulations of  
198  $\alpha$ -synuclein at 283 K to match conditions in PRE experiments (*Dedmon et al., 2005*). The protocol  
199 was otherwise identical to above.

### 200 **Multidomain protein simulations**

201 We selected a set of three multidomain proteins with SAXS data available: full-length hnRNPA1  
202 (hnRNPA1), full-length hnRNPA1 with an N-terminal His-SUMO tag (hSUMO-hnRNPA1) and TIA-1.  
203 SAXS data and initial structures of hnRNPA1 and hSUMO-hnRNPA1 were taken from *Martin et al.*  
204 (*2021*). These structures were built based on the structures of SUMO1 (PDB: 1A5R) (*Bayer et al.,*  
205 *1998*) and the RRM1 and RRM2 domains (PDB: 1HA1) (*Shamoo et al., 1997*). The initial structure of  
206 TIA-1 was taken from *Larsen et al. (2020)* and SAXS data was taken from *Sonntag et al. (2017)*. The  
207 structure was built based on the structures of RRM1 (PDB 5O2V) (*Sonntag et al., 2017*), RRM2 (PDB:  
208 5O3J) (*Sonntag et al., 2017*) and the RRM2-RRM3 complex (PDB: 2MJN) (*Wang et al., 2014*).

209 Simulations of multidomain proteins were set up and run using the same protocol as for the  
210 IDP simulations with a few exceptions: (i) Secondary structure was assigned with DSSP (*Kabsch*  
211 *and Sander, 1983*) in Martinize2. (ii) An elastic network model was applied with Martinize2 to keep  
212 folded domains intact. Interdomain elastic restraints and the elastic restraints in disordered re-  
213 gions and linker regions were removed. The elastic restraints consisted of a harmonic potential of  
214  $500 \text{ kJ mol}^{-1} \text{ nm}^{-2}$  between backbone beads within a 1.2 nm cut-off.

### 215 **Ubiquitin dimerization simulations**

216 Initial structures of ubiquitin were taken from *Vijay-Kumar et al. (1987)* (PDB: 1UBQ). Simulations  
217 of ubiquitin were set up and run using the same protocol as for IDP simulations with a few ex-  
218 ceptions: (i) Two copies of ubiquitin were placed in a 14.92 nm x 14.92 nm x 14.92 nm cubic box,  
219 giving a protein concentration of 1 mM. (ii) Secondary structure was assigned with DSSP (*Kabsch*  
220 *and Sander, 1983*) in Martinize2. (iii) An elastic network model was applied with Martinize2. We  
221 removed elastic restraints from the C-terminus (residue 72-76) of ubiquitin to allow for flexibility  
222 (*Lindorff-Larsen et al., 2005*). The elastic restraints consisted of a harmonic potential of  $500 \text{ kJ mol}^{-1}$   
223  $\text{nm}^{-2}$  between backbone beads within a 0.9 nm cut-off. We ran simulations testing three different  
224 values of  $\lambda$ : 1.00, 1.06 and 1.08. For each value of  $\lambda$ , we ran ten replicas of 40  $\mu\text{s}$  each.

### 225 **FUS LCD and $\alpha$ -synuclein dimerization simulations**

226 Simulations of two copies of FUS and two copies of  $\alpha$ -synuclein were set up and run using the  
227 same protocol as for IDP simulations with a few exceptions: Two copies of FUS were placed in a  
228 40.5 nm x 40.5 nm x 40.5 nm cubic box, giving a protein concentration of 50  $\mu\text{M}$  to match PRE  
229 experiments. Two copies of  $\alpha$ -synuclein were placed in a 25.51 nm x 25.51 nm x 25.51 nm cubic  
230 box, giving a protein concentration of 200  $\mu\text{M}$  to match PRE experiments. We ran simulations  
231 testing three different values of  $\lambda$ : 1.00, 1.06 and 1.08, with ten replicas for each  $\lambda$ . For simulations  
232 of FUS at  $\lambda=1.00$ , replicas were run for between 11 and 13.5  $\mu\text{s}$  each. However, we did not observe  
233 unbinding of the dimer after dimerization in any of the replicas, so these simulations were not  
234 extended further. For simulations of FUS at  $\lambda=1.06$  and 1.08, replicas were run for between 25 and  
235 29  $\mu\text{s}$  each. For simulations of  $\alpha$ -synuclein, replicas were run for between 12 and 27  $\mu\text{s}$  each.

## 236 Calculating the radius of gyration

237 We calculated the radius of gyration ( $R_g$ ) from the coarse-grained trajectories using Gromacs *gyrate*  
238 (*Abraham et al., 2015*). Error bars on simulation  $R_g$  were determined using block-error analysis  
239 (*Flyvbjerg and Petersen, 1989*). Experimental  $R_g$  and corresponding error bars were calculated  
240 from SAXS profiles by Guinier analysis using ATSAS AUTORG with default settings (*Petoukhov et al.,*  
241 *2007*).

## 242 SAXS calculations

243 After each trajectory had been backmapped to all-atom resolution, we extracted 15000 frames  
244 (evenly distributed in the time-series) to calculate SAXS profiles using Pepsi-SAXS (*Grudin et al.,*  
245 *2017*). To avoid potential problems of overfitting the parameters for the contrast of the hydration  
246 layer ( $\delta\rho$ ) and the displaced solvent ( $r_0$ ) (if these are fitted individually to each structure) we used  
247 values that have previously been shown to provide good agreement with experiment for flexible  
248 proteins (*Pesce and Lindorff-Larsen, 2021*). Values for the intensity of the forward scattering ( $I(0)$ )  
249 and the constant background (*cst*) were fitted globally with least-squares regression weighted by  
250 the experimental errors using the Scikit-learn python library (*Pedregosa et al., 2011*).

251 To quantify the agreement between experimental SAXS profiles and those calculated from sim-  
252 ulations, we calculated the reduced  $\chi^2$ :

$$\chi_r^2 = \frac{1}{m} \sum_q^m \frac{(I_q^{CALC} - I_q^{EXP})^2}{\sigma(BIFT)_q^2} \quad (1)$$

253 Here  $m$  is the number of data points,  $I_q^{CALC}$  and  $I_q^{EXP}$  are the averaged calculated SAXS inten-  
254 sity and the experimental SAXS intensity at scattering angle  $q$ , and  $\sigma(BIFT)_q$  is the error for the  
255 experimental intensity at scattering angle  $q$  corrected according to:  $\sigma(BIFT)_q = \sigma_q \sqrt{\chi_{r,BIFT}^2}$ , where  
256  $\sigma_q$  is the experimental error and  $\chi_{r,BIFT}^2$  quantifies the agreement between the experimental SAXS  
257 data and the model SAXS profile calculated from the pair distance distribution function obtained  
258 through the Bayesian Indirect Fourier Transform algorithm (BIFT) (*Hansen, 2000*). This approach  
259 has been shown to lead to improved error estimates for experimental SAXS profiles (*Larsen and*  
260 *Pedersen, 2021*) and, here, made it possible to compare more directly and average over the  $\chi_r^2$  from  
261 the different systems. BIFT optimizes the hyperparameter  $D_{max}$  (maximum distance between scat-  
262 tering particles in the system); as an initial estimate of  $D_{max}$ , we used the  $D_{max}$  over all simulations  
263 for each protein.

## 264 PRE calculations

265 We used the DEER-PREdict software (*Tesei et al., 2021a*) to calculate PRE NMR data from all-atom  
266 backmapped trajectories. DEER-PREdict implements a model-free formalism (*Iwahara et al., 2004*)  
267 combined with a rotamer library approach to describe the MTSL spin-label probe (*Polyhach et al.,*  
268 *2011*). We assumed an effective correlation time of the spin label,  $\tau_r$ , of 100 ps and fitted an over-  
269 all molecular correlation time,  $\tau_c$ , within the interval  $1 \leq \tau_c \leq 20$  ns. Additionally, to calculate PRE  
270 intensity ratios, we assumed a transverse relaxation rate for the diamagnetic protein of  $10 \text{ s}^{-1}$   
271 and approximated the total INEPT time of the HSQC measurement to 10 ms (*Battiste and Wag-*  
272 *ner, 2000*). We calculated intermolecular PRE rates from two-chain simulations treating one chain  
273 as spin-labeled and the other as  $^{15}\text{N}$ -labeled. We averaged the PRE rates obtained for the two  
274 combinations of spin-labeled and  $^{15}\text{N}$ -labeled chain, fitting  $\tau_c$  to this average. Agreement between  
275 calculated and experimental PREs was quantified by the reduced  $\chi^2$  over all spin-label sites:

$$\chi_r^2 = \frac{1}{N_{labels} N_{res}} \sum_j^{N_{labels}} \sum_i^{N_{res}} \left( \frac{Y_{ij}^{exp} - Y_{ij}^{calc}}{\sigma_{ij}^{exp}} \right)^2 \quad (2)$$

276 Where  $N_{labels}$  and  $N_{res}$  are the number of spin-labels and residues,  $Y_{ij}^{exp}$  and  $Y_{ij}^{calc}$  are the experi-  
277 mental and calculated PRE rates for label  $j$  and residue  $i$ , and  $\sigma_{ij}^{exp}$  is the experimental error of the



278 PRE rate for label  $j$  and residue  $i$ .

### 279 Dimerization calculations

280 We analyzed the population of the bound and unbound states of ubiquitin, FUS and  $\alpha$ -synuclein  
 281 homodimers in our simulations. We calculated the minimum distance between any beads in the  
 282 two proteins over the trajectory using Gromacs *mindist* (Abraham *et al.*, 2015). The fraction bound  
 283 was defined as the fraction of frames where the minimum distance was below 0.8 nm, and error  
 284 bars as the standard error of the mean over the ten replica simulations. For simulations of ubiq-  
 285 uitin, the fraction bound was also calculated using the minimum distance only between beads in  
 286 the binding site (residue 8, 13, 44, 45, 46, 49, 67, 68, 70, 71, and 73) defined by NMR chemical shift  
 287 perturbations (Liu *et al.*, 2012). This greatly reduced population of the bound state, showing that  
 288 Martini3 did not capture the specificity of the interaction.

### 289 Data availability

290 Scripts and data are at [github.com/KULL-Centre/papers/tree/main/2021/Martini-Thomasen-et-al](https://github.com/KULL-Centre/papers/tree/main/2021/Martini-Thomasen-et-al)

### 291 Protein systems

**Table 1.** IDP simulations for SAXS and  $R_g$  calculations: Number of amino acid residues ( $N_R$ ), box size ( $d$ ), experimental  $R_g$ , simulation temperature ( $T$ ), and salt concentration in the simulation ( $c_s$ ).

| Protein             | $N_R$ | $d$ (nm) | SAXS $R_g$ (nm) | $T$ (K) | $c_s$ (M) | SAXS ref.                       |
|---------------------|-------|----------|-----------------|---------|-----------|---------------------------------|
| Hst5                | 24    | 13.7     | $1.38 \pm 0.01$ | 293     | 0.15      | <i>Jephthah et al. (2019)</i>   |
| (Hst5) <sub>2</sub> | 48    | 17.4     | $1.87 \pm 0.07$ | 298     | 0.15      | <i>Fagerberg et al. (2020)</i>  |
| ACTR                | 71    | 18.9     | $2.63 \pm 0.1$  | 278     | 0.2       | <i>Kjaergaard et al. (2010)</i> |
| Sic1                | 92    | 21.4     | $3.00 \pm 0.4$  | 293     | 0.2       | <i>Gomes et al. (2020)</i>      |
| CoINT               | 98    | 20.5     | $2.83 \pm 0.1$  | 277     | 0.4       | <i>Johnson et al. (2017)</i>    |
| K19                 | 99    | 20.4     | $3.50 \pm 0.1$  | 288     | 0.15      | <i>Mylonas et al. (2008)</i>    |
| A1                  | 137   | 21.5     | $2.72 \pm 0.02$ | 296     | 0.05      | <i>Martin et al. (2020)</i>     |
| $\alpha$ Syn        | 140   | 24.1     | $3.55 \pm 0.05$ | 293     | 0.2       | <i>Ahmed et al. (2021)</i>      |
| FhuA                | 144   | 23.9     | $3.34 \pm 0.1$  | 298     | 0.15      | <i>Riback et al. (2017)</i>     |
| K25                 | 185   | 27.4     | $4.10 \pm 0.2$  | 288     | 0.15      | <i>Mylonas et al. (2008)</i>    |
| CoRNID              | 271   | 32.5     | $4.70 \pm 0.2$  | 293     | 0.2       | <i>Cordeiro et al. (2019)</i>   |
| PNt                 | 334   | 31.2     | $5.11 \pm 0.2$  | 298     | 0.15      | <i>Riback et al. (2017)</i>     |

**Table 2.** Multidomain protein simulations for SAXS and  $R_g$  calculations: Number of amino acid residues ( $N_R$ ), box size ( $d$ ), experimental  $R_g$ , simulation temperature ( $T$ ), and salt concentration in the simulation ( $c_s$ ).

| Protein  | $N_R$ | $d$ (nm) | SAXS $R_g$ (nm)  | $T$ (K) | $c_s$ (M) | SAXS ref.                    |
|----------|-------|----------|------------------|---------|-----------|------------------------------|
| TIA1     | 275   | 17.9     | $2.75 \pm 0.031$ | 300     | 0.1       | <i>Sonntag et al. (2017)</i> |
| A1       | 314   | 28.6     | $3.12 \pm 0.022$ | 300     | 0.15      | <i>Martin et al. (2021)</i>  |
| hSUMO-A1 | 433   | 29.1     | $3.37 \pm 0.014$ | 300     | 0.1       | <i>Martin et al. (2021)</i>  |

**Table 3.** IDP simulations for single-chain PRE calculations: Number of amino acid residues ( $N_R$ ), box size ( $d$ ), experimental  $R_g$ , simulation temperature ( $T$ ), and salt concentration in the simulation ( $c_s$ ).

| Protein      | $N_R$ | $d$ (nm) | $T$ (K) | $c_s$ (M) | PRE ref.                     |
|--------------|-------|----------|---------|-----------|------------------------------|
| $\alpha$ Syn | 140   | 24.1     | 283     | 0.2       | <i>Dedmon et al. (2005)</i>  |
| A2           | 155   | 21.8     | 298     | 0.005     | <i>Ryan et al. (2018)</i>    |
| FUS          | 163   | 19.4     | 298     | 0.15      | <i>Monahan et al. (2017)</i> |

**Table 4.** Protein dimerization simulations: Number of amino acid residues ( $N_R$ ), box size ( $d$ ), experimental  $R_g$ , simulation temperature ( $T$ ), and salt concentration in the simulation ( $c_s$ ).

| Protein      | $N_R$ | $d$ (nm) | $T$ (K) | $c_s$ (M) | PRE or affinity ref.         |
|--------------|-------|----------|---------|-----------|------------------------------|
| $\alpha$ Syn | 140x2 | 25.5     | 283     | 0.125     | <i>Dedmon et al. (2005)</i>  |
| FUS          | 163x2 | 40.5     | 298     | 0.15      | <i>Monahan et al. (2017)</i> |
| Ubq          | 76x2  | 14.9     | 303     | 0.11      | <i>Liu et al. (2012)</i>     |

## References

- 292  
293 **Abraham MJ**, Murtola T, Schulz R, Páll S, Smith JC, Hess B, Lindahl E. Gromacs: High performance molecular  
294 simulations through multi-level parallelism from laptops to supercomputers. *SoftwareX*. 2015; 1-2:19–25.  
295 doi: [10.1016/j.softx.2015.06.001](https://doi.org/10.1016/j.softx.2015.06.001).
- 296 **Ahmed MC**, Skaanning LK, Jussupow A, Newcombe EA, Kragelund BB, Camilloni C, Langkilde AE, Lindorff-Larsen  
297 K. Refinement of  $\alpha$ -Synuclein Ensembles Against SAXS Data: Comparison of Force Fields and Methods. *Frontiers in Molecular Biosciences*. 2021; 8(April):1–13. doi: [10.3389/fmolb.2021.654333](https://doi.org/10.3389/fmolb.2021.654333).
- 298  
299 **Alessandri R**, Souza PC, Thallmair S, Melo MN, De Vries AH, Marrink SJ. Pitfalls of the Martini model. *Journal of chemical theory and computation*. 2019; 15(10):5448–5460.  
300
- 301 **Battiste JL**, Wagner G. Utilization of site-directed spin labeling and high-resolution heteronuclear nuclear mag-  
302 netic resonance for global fold determination of large proteins with limited nuclear overhauser effect data.  
303 *Biochemistry*. 2000; 39(18):5355–5365.
- 304 **Bayer P**, Arndt A, Metzger S, Mahajan R, Melchior F, Jaenicke R, Becker J. Structure determination of  
305 the small ubiquitin-related modifier SUMO-1. *Journal of Molecular Biology*. 1998; 280(2):275–286. doi:  
306 [10.1006/jmbi.1998.1839](https://doi.org/10.1006/jmbi.1998.1839).
- 307 **Benayad Z**, Von Bülow S, Stelzl LS, Hummer G. Simulation of FUS Protein Condensates with an Adapted  
308 Coarse-Grained Model. *Journal of Chemical Theory and Computation*. 2021; 17(1):525–537. doi:  
309 [10.1021/acs.jctc.0c01064](https://doi.org/10.1021/acs.jctc.0c01064).
- 310 **Berg A**, Peter C. Simulating and analysing configurational landscapes of protein–protein contact formation.  
311 *Interface focus*. 2019; 9(3):20180062.
- 312 **Best RB**, Zheng W, Mittal J. Balanced protein-water interactions improve properties of disordered proteins and  
313 non-specific protein association. *Journal of Chemical Theory and Computation*. 2014; 10(11):5113–5124. doi:  
314 [10.1021/ct500569b](https://doi.org/10.1021/ct500569b).
- 315 **Boeynaems S**, Alberti S, Fawzi NL, Mittag T, Polymenidou M, Rousseau F, Schymkowitz J, Shorter J, Wolozin B,  
316 Van Den Bosch L, Tompa P, Fuxreiter M. Protein Phase Separation: A New Phase in Cell Biology. *Trends in*  
317 *Cell Biology*. 2018; 28(6):420–435. <http://dx.doi.org/10.1016/j.tcb.2018.02.004>, doi: [10.1016/j.tcb.2018.02.004](https://doi.org/10.1016/j.tcb.2018.02.004).
- 318 **Bottaro S**, Lindorff-Larsen K. Biophysical experiments and biomolecular simulations: A perfect match? *Sci-*  
319 *ence*. 2018 7; 361(6400):355 LP – 360. <http://science.sciencemag.org/content/361/6400/355.abstract>, doi:  
320 [10.1126/science.aat4010](https://doi.org/10.1126/science.aat4010).
- 321 **Bussi G**, Donadio D, Parrinello M. Canonical sampling through velocity rescaling. *Journal of Chemical Physics*.  
322 2007; 126(1):1–7. doi: [10.1063/1.2408420](https://doi.org/10.1063/1.2408420).
- 323 **Choi JM**, Holehouse AS, Pappu RV. Physical principles underlying the complex biology of intracellular phase  
324 transitions. *Annual Review of Biophysics*. 2020; 49:107–133.
- 325 **Cordeiro TN**, Sibille N, Germain P, Barthe P, Boulahtouf A, Allemand F, Bailly R, Vivat V, Ebel C, Barducci A, Bour-  
326 guet W, le Maire A, Bernadó P. Interplay of Protein Disorder in Retinoic Acid Receptor Heterodimer and Its  
327 Corepressor Regulates Gene Expression. *Structure*. 2019; 27(8):1270–1285. doi: [10.1016/j.str.2019.05.001](https://doi.org/10.1016/j.str.2019.05.001).
- 328 **Dedmon MM**, Lindorff-Larsen K, Christodoulou J, Vendruscolo M, Dobson CM. Mapping long-range interactions  
329 in  $\alpha$ -synuclein using spin-label NMR and ensemble molecular dynamics simulations. *Journal of the American*  
330 *Chemical Society*. 2005; 127(2):476–477. doi: [10.1021/ja044834j](https://doi.org/10.1021/ja044834j).
- 331 **Fagerberg E**, Månsson LK, Lenton S, Skepö M. The Effects of Chain Length on the Structural Properties of Intrin-  
332 sically Disordered Proteins in Concentrated Solutions. *Journal of Physical Chemistry B*. 2020; 124(52):11843–  
333 11853. doi: [10.1021/acs.jpcc.0c09635](https://doi.org/10.1021/acs.jpcc.0c09635).

- 334 **Flyvbjerg H**, Petersen HG. Error estimates on averages of correlated data. *The Journal of Chemical Physics*.  
335 1989; 91(1):461–466. doi: [10.1063/1.457480](https://doi.org/10.1063/1.457480).
- 336 **Gomes GNW**, Krzeminski M, Namini A, Martin EW, Mittag T, Head-Gordon T, Forman-Kay JD, Gradinaru  
337 CC. Conformational Ensembles of an Intrinsically Disordered Protein Consistent with NMR, SAXS, and  
338 Single-Molecule FRET. *Journal of the American Chemical Society*. 2020; 142(37):15697–15710. doi:  
339 [10.1021/jacs.0c02088](https://doi.org/10.1021/jacs.0c02088).
- 340 **Grudinin S**, Garkavenko M, Kazennov A. Pepsi-SAXS: An adaptive method for rapid and accurate computation  
341 of small-angle X-ray scattering profiles. *Acta Crystallographica Section D: Structural Biology*. 2017; 73(5):449–  
342 464. doi: [10.1107/S2059798317005745](https://doi.org/10.1107/S2059798317005745).
- 343 **Hansen S**. Bayesian estimation of hyperparameters for indirect Fourier transformation in small-angle  
344 scattering. *Journal of Applied Crystallography*. 2000 12; 33(6):1415–1421. [https://doi.org/10.1107/  
345 S0021889800012930](https://doi.org/10.1107/S0021889800012930), doi: [10.1107/S0021889800012930](https://doi.org/10.1107/S0021889800012930).
- 346 **Ingólfsson HI**, Lopez CA, Uusitalo JJ, de Jong DH, Gopal SM, Periole X, Marrink SJ. The power of coarse graining in  
347 biomolecular simulations. *Wiley Interdisciplinary Reviews: Computational Molecular Science*. 2014; 4(3):225–  
348 248. doi: [10.1002/wcms.1169](https://doi.org/10.1002/wcms.1169).
- 349 **Iwahara J**, Schwieters CD, Clore GM. Ensemble Approach for NMR Structure Refinement against 1H Para-  
350 magnetic Relaxation Enhancement Data Arising from a Flexible Paramagnetic Group Attached to a Macro-  
351 molecule. *J Am Chem Soc*. 2004 4; 126(18):5879–5896.
- 352 **Jephtah S**, Staby L, Kragelund BB, Skepö M. Temperature Dependence of Intrinsically Disordered Proteins in  
353 Simulations: What are We Missing? *Journal of Chemical Theory and Computation*. 2019; 15(4):2672–2683.  
354 doi: [10.1021/acs.jctc.8b01281](https://doi.org/10.1021/acs.jctc.8b01281).
- 355 **Johnson CL**, Solovyova AS, Hecht O, Macdonald C, Waller H, Grossmann JG, Moore GR, Lakey JH. The Two-  
356 State Prehensile Tail of the Antibacterial Toxin Colicin N. *Biophysical Journal*. 2017; 113(8):1673–1684. doi:  
357 [10.1016/j.bpj.2017.08.030](https://doi.org/10.1016/j.bpj.2017.08.030).
- 358 **Kabsch W**, Sander C. Dictionary of protein secondary structure: Pattern recognition of hydrogen-bonded and  
359 geometrical features. *Biopolymers*. 1983 12; 22(12):2577–2637. <https://doi.org/10.1002/bip.360221211>, doi:  
360 <https://doi.org/10.1002/bip.360221211>.
- 361 **Kjaergaard M**, Nørholm AB, Hendus-Altenburger R, Pedersen SF, Poulsen FM, Kragelund BB. Temperature-  
362 dependent structural changes in intrinsically disordered proteins: Formation of  $\alpha$ -helices or loss of polypro-  
363 line II? *Protein Science*. 2010; 19(8):1555–1564. doi: [10.1002/pro.435](https://doi.org/10.1002/pro.435).
- 364 **Lamprakis C**, Andreadelis I, Manchester J, Velez-Vega C, Duca JS, Cournia Z. Evaluating the efficiency of the Mar-  
365 tini force field to study protein dimerization in aqueous and membrane environments. *Journal of Chemical  
366 Theory and Computation*. 2021; 17(5):3088–3102.
- 367 **Larsen AH**, Pedersen MC. Experimental noise in small-angle scattering can be assessed using the Bayesian  
368 indirect Fourier transformation. *Journal of Applied Crystallography*. 2021 10; 54(5). [https://doi.org/10.1107/  
369 S1600576721006877](https://doi.org/10.1107/S1600576721006877), doi: [10.1107/S1600576721006877](https://doi.org/10.1107/S1600576721006877).
- 370 **Larsen AH**, Wang Y, Bottaro S, Grudinin S, Arleth L, Lindorff-Larsen K. RESEARCH ARTICLE Combining molecular  
371 dynamics simulations with small-angle X-ray and neutron scattering data to study multi-domain proteins in  
372 solution. *PLoS Computational Biology*. 2020; 16(4):1–29. <http://dx.doi.org/10.1371/journal.pcbi.1007870>, doi:  
373 [10.1371/journal.pcbi.1007870](https://doi.org/10.1371/journal.pcbi.1007870).
- 374 **Lindorff-Larsen K**, Best RB, DePristo MA, Dobson CM, Vendruscolo M. Simultaneous determination of pro-  
375 tein structure and dynamics. *Nature*. 2005; 433(7022):128–132. <https://doi.org/10.1038/nature03199>, doi:  
376 [10.1038/nature03199](https://doi.org/10.1038/nature03199).
- 377 **Liu Z**, Zhang WP, Xing Q, Ren X, Liu M, Tang C. Noncovalent dimerization of ubiquitin. *Angewandte Chemie -  
378 International Edition*. 2012; 51(2):469–472. doi: [10.1002/anie.201106190](https://doi.org/10.1002/anie.201106190).
- 379 **Majumder A**, Straub JE. Addressing the Excessive Aggregation of Membrane Proteins in the MARTINI Model.  
380 *Journal of Chemical Theory and Computation*. 2021; 17(4):2513–2521.
- 381 **Marrink SJ**, Risselada HJ, Yefimov S, Tieleman DP, De Vries AH. The MARTINI force field: Coarse grained  
382 model for biomolecular simulations. *Journal of Physical Chemistry B*. 2007; 111(27):7812–7824. doi:  
383 [10.1021/jp071097f](https://doi.org/10.1021/jp071097f).

- 384 **Martin EW**, Holehouse AS, Peran I, Farag M, Incicco JJ, Bremer A, Grace CR, Soranno A, Pappu RV, Mittag T.  
385 Valence and patterning of aromatic residues determine the phase behavior of prion-like domains. *Science*.  
386 2020; 367(6478):694–699. doi: [10.1126/science.aaw8653](https://doi.org/10.1126/science.aaw8653).
- 387 **Martin EW**, Thomasen FE, Milkovic NM, Cuneo MJ, Grace CR, Nourse A, Lindorff-Larsen K, Mittag T. Interplay of  
388 folded domains and the disordered low-complexity domain in mediating hnRNP1 phase separation. *Nucleic*  
389 *Acids Research*. 2021; 49(5):2931–2945. doi: [10.1093/nar/gkab063](https://doi.org/10.1093/nar/gkab063).
- 390 **Monahan Z**, Ryan VH, Janke AM, Burke KA, Rhoads SN, Zerze GH, O’Meally R, Dignon GL, Conicella AE, Zheng  
391 W, Best RB, Cole RN, Mittal J, Shewmaker F, Fawzi NL. Phosphorylation of the FUS low-complexity do-  
392 main disrupts phase separation, aggregation, and toxicity. *The EMBO Journal*. 2017; 36(20):2951–2967. doi:  
393 [10.15252/emboj.201696394](https://doi.org/10.15252/emboj.201696394).
- 394 **Monticelli L**, Kandasamy SK, Periolo X, Larson RG, Tieleman DP, Marrink SJ. The MARTINI coarse-grained  
395 force field: Extension to proteins. *Journal of Chemical Theory and Computation*. 2008; 4(5):819–834. doi:  
396 [10.1021/ct700324x](https://doi.org/10.1021/ct700324x).
- 397 **Mylonas E**, Hascher A, Bernadó P, Blackledge M, Mandelkow E, Svergun DI. Domain conformation of tau  
398 protein studied by solution small-angle X-ray scattering. *Biochemistry*. 2008; 47(39):10345–10353. doi:  
399 [10.1021/bi800900d](https://doi.org/10.1021/bi800900d).
- 400 **Parrinello M**, Rahman A. Polymorphic transitions in single crystals: A new molecular dynamics method. *Journal*  
401 *of Applied Physics*. 1981; 52(12):7182–7190. doi: [10.1063/1.328693](https://doi.org/10.1063/1.328693).
- 402 **Pedregosa F**, Varoquaux G, Gramfort A, Michel V, Thirion B, Grisel O, Blondel M, Prettenhofer P, Weiss R,  
403 Dubourg V, Vanderplas J, Passos A, Cournapeau D, Brucher M, Perrot M, Duchesnay A. Scikit-learn: Machine  
404 learning in Python. *Journal of Machine Learning Research*. 2011; 12:2825–2830.
- 405 **Pesce F**, Lindorff-Larsen K. Refining conformational ensembles of flexible proteins against small-angle X-ray  
406 scattering data. *bioRxiv*. 2021 1; p. 2021.05.29.446281. [http://biorxiv.org/content/early/2021/09/09/2021.05.](http://biorxiv.org/content/early/2021/09/09/2021.05.29.446281.abstract)  
407 [29.446281.abstract](http://biorxiv.org/content/early/2021/09/09/2021.05.29.446281.abstract), doi: [10.1101/2021.05.29.446281](https://doi.org/10.1101/2021.05.29.446281).
- 408 **Petoukhov MV**, Konarev PV, Kikhney AG, Svergun DI. ATSAS 2.1 towards automated and web-supported small-  
409 angle scattering data analysis. *Journal of Applied Crystallography*. 2007 4; 40(s1):s223–s228. [https://doi.org/](https://doi.org/10.1107/S0021889807002853)  
410 [10.1107/S0021889807002853](https://doi.org/10.1107/S0021889807002853), doi: [10.1107/S0021889807002853](https://doi.org/10.1107/S0021889807002853).
- 411 **Polyhach Y**, Bordignon E, Jeschke G. Rotamer libraries of spin labelled cysteines for protein studies. *Phys*  
412 *Chem Chem Phys*. 2011; 13(6):2356–2366. <https://doi.org/10.1039/c0cp01865a>.
- 413 **Riback JA**, Bowman MA, Zmyslowski AM, Knoverek CR, Jumper JM, Hinshaw JR, Kaye EB, Freed KF, Clark PL,  
414 Sosnick TR. Innovative scattering analysis shows that hydrophobic disordered proteins are expanded in  
415 water. *Science (New York, NY)*. 2017; 358(6360):238–241. <http://www.ncbi.nlm.nih.gov/pubmed/29026044>.
- 416 **Ryan VH**, Dignon GL, Zerze GH, Chabata CV, Silva R, Conicella AE, Amaya J, Burke KA, Mittal J, Fawzi NL. Mech-  
417 anistic View of hnRNP2 Low-Complexity Domain Structure, Interactions, and Phase Separation Altered by  
418 Mutation and Arginine Methylation. *Molecular cell*. 2018 2; 69(3):465–479. doi: [10.1016/j.molcel.2017.12.022](https://doi.org/10.1016/j.molcel.2017.12.022).
- 419 **Shamoo Y**, Krueger U, Rice LM, Williams KR, Steitz TA. Crystal structure of the two RNA binding domains of  
420 human hnRNP A1 at 1.75 Å resolution. *Nature Structural Biology*. 1997; 4(3):215–222. [https://doi.org/10.](https://doi.org/10.1038/nsb0397-215)  
421 [1038/nsb0397-215](https://doi.org/10.1038/nsb0397-215), doi: [10.1038/nsb0397-215](https://doi.org/10.1038/nsb0397-215).
- 422 **Sonntag M**, Jagtap PKA, Simon B, Appavou MS, Geerlof A, Stehle R, Gabel F, Hennig J, Sattler M. Seg-  
423 mental, Domain-Selective Perdeuteration and Small-Angle Neutron Scattering for Structural Analysis of  
424 Multi-Domain Proteins. *Angewandte Chemie - International Edition*. 2017; 56(32):9322–9325. doi:  
425 [10.1002/anie.201702904](https://doi.org/10.1002/anie.201702904).
- 426 **Souza PCT**, Alessandri R, Barnoud J, Thallmair S, Faustino I, Grünwald F, Patmanidis I, Abdizadeh H, Bruininks  
427 BMH, Wassenaar TA, Kroon PC, Melcr J, Nieto V, Corradi V, Khan HM, Domański J, Javanainen M, Martinez-  
428 Seara H, Reuter N, Best RB, et al. Martini 3: a general purpose force field for coarse-grained molecular  
429 dynamics. *Nature Methods*. 2021; 18(4):382–388. doi: [10.1038/s41592-021-01098-3](https://doi.org/10.1038/s41592-021-01098-3).
- 430 **Stark AC**, Andrews CT, Elcock AH. Toward optimized potential functions for protein-protein interactions in  
431 aqueous solutions: osmotic second virial coefficient calculations using the MARTINI coarse-grained force  
432 field. *Journal of chemical theory and computation*. 2013 9; 9(9). doi: [10.1021/ct400008p](https://doi.org/10.1021/ct400008p).

- 433 **Tesei G**, Martins JM, Kunze MBA, Wang Y, Crehuet R, Lindorff-Larsen K. DEER-PREdict: Software for efficient cal-  
434 culation of spin-labeling EPR and NMR data from conformational ensembles. {PLOS} Computational Biology.  
435 2021 1; 17(1):e1008551. <https://doi.org/10.1371/journal.pcbi.1008551>, doi: 10.1371/journal.pcbi.1008551.
- 436 **Tesei G**, Schulze TK, Crehuet R, Lindorff-Larsen K. Accurate model of liquid-liquid phase behaviour  
437 of intrinsically-disordered proteins from optimization of single-chain properties. bioRxiv. 2021  
438 1; p. 2021.06.23.449550. <http://biorxiv.org/content/early/2021/09/10/2021.06.23.449550.abstract>, doi:  
439 10.1101/2021.06.23.449550.
- 440 **Tsanai M**, Frederix PWJM, Schroer CFE, Souza PCT, Marrink SJ. Coacervate formation studied by explicit solvent  
441 coarse-grain molecular dynamics with the Martini model. Chem Sci. 2021; 12(24):8521–8530. [http://dx.doi.](http://dx.doi.org/10.1039/D1SC00374G)  
442 [org/10.1039/D1SC00374G](http://dx.doi.org/10.1039/D1SC00374G), doi: 10.1039/D1SC00374G.
- 443 **Vijay-Kumar S**, Bugg CE, Cook WJ. Structure of ubiquitin refined at 1.8Å resolution. Journal of Molecular  
444 Biology. 1987; 194(3):531–544. <https://www.sciencedirect.com/science/article/pii/0022283687906796>, doi:  
445 [https://doi.org/10.1016/0022-2836\(87\)90679-6](https://doi.org/10.1016/0022-2836(87)90679-6).
- 446 **Wang I**, Hennig J, Jagtap PKA, Sonntag M, Valcárcel J, Sattler M. Structure, dynamics and RNA binding of the  
447 multi-domain splicing factor TIA-1. Nucleic Acids Research. 2014; 42(9):5949–5966. doi: 10.1093/nar/gku193.
- 448 **Wassenaar TA**, Ingólfsson HI, Böckmann RA, Tieleman DP, Marrink SJ. Computational lipidomics with insane:  
449 A versatile tool for generating custom membranes for molecular simulations. Journal of Chemical Theory  
450 and Computation. 2015; 11(5):2144–2155. doi: 10.1021/acs.jctc.5b00209.
- 451 **Wassenaar TA**, Pluhackova K, Böckmann RA, Marrink SJ, Tieleman DP. Going Backward: A Flexible Geometric  
452 Approach to Reverse Transformation from Coarse Grained to Atomistic Models. Journal of Chemical Theory  
453 and Computation. 2014 2; 10(2):676–690. <https://doi.org/10.1021/ct400617g>, doi: 10.1021/ct400617g.
- 454 **Wright PE**, Dyson HJ. Intrinsically unstructured proteins: Re-assessing the protein structure-function paradigm.  
455 Journal of Molecular Biology. 1999; 293(2):321–331. doi: 10.1006/jmbi.1999.3110.
